# Supplementary material
Source: PubMed Central journal article supplement (PMC4711271)
Supplement: NIHMS731341-supplement-Supplemental_Data.pdf [file NIHMS731341-supplement-Supplemental_Data.pdf]

**Supporting Information**  
**for**  
**“Simultaneous Quantification of Methylated Cytidine and Adenosine in  
Cellular and Tissue RNA by Nano-Flow Liquid Chromatography-Tandem  
Mass Spectrometry Coupled with the Stable Isotope-dilution Method”**

By Lijuan Fu, et al. *Anal. Chem.*, 2015 (ac-2015-009515)

**Table S1.** Optimized instrument conditions for LC-ESI-MS<sup>3</sup> analysis of m<sup>5</sup>C, Cm, m<sup>6</sup>A and Am and detection limits for these modified nucleosides. The LOQ (limit of quantitation, defined as the amount of analyte that gives rise to a signal-to-noise ratio of 10) and the LOD (limit of detection, defined as the amount of analyte that gives rise to a signal-to-noise ratio of 3) values represent the means and standard deviations of the results from three measurements of the unlabeled standards. A constant activation time of 30 ms was employed for all the measurement.

| Compounds        | Transitions (MS <sup>3</sup> or MS <sup>2</sup> ) |                 | Isolation Width | Optimized LTQ Parameters    |              | LOD (amol) | LOQ (amol) |
|------------------|---------------------------------------------------|-----------------|-----------------|-----------------------------|--------------|------------|------------|
|                  | Unlabeled                                         | Isotope-labeled |                 | Normalized Collision Energy | Activation Q |            |            |
| C                | 244→112                                           | 247→115         | 3               | 37                          | 0.25         |            |            |
|                  | 112→95                                            | 115→97          | 2               | 40                          | 0.50         |            |            |
| m <sup>5</sup> C | 258→126                                           | 263→126         | 2               | 37                          | 0.25         | 2.8±0.4    | 9±2        |
|                  | 126→108                                           | 126→108         | 2               | 40                          | 0.50         |            |            |
| Cm               | 258→112                                           | 263→112         | 2               | 37                          | 0.25         | 2.2±0.7    | 7±2        |
|                  | 112→95                                            | 112→95          | 2               | 40                          | 0.50         |            |            |
| A                | 268→136                                           | 273→136         | 3               | 35                          | 0.25         |            |            |
| m <sup>6</sup> A | 282→150                                           | 285→153         | 3               | 39                          | 0.31         | 0.7±0.2    | 1.9±0.6    |
|                  | 150→94                                            | 153→94          | 2               | 35                          | 0.37         |            |            |
| Am               | 282→136                                           | 287→136         | 3               | 39                          | 0.31         | 1.0±0.4    | 3.4±1.2    |
|                  | 136→94                                            | 136→94          | 2               | 35                          | 0.37         |            |            |

**Table S2.** Precision and accuracy for the measurements of m<sup>5</sup>C, Cm, m<sup>6</sup>A and Am from three validation runs. A 5-μL aliquot was injected in each run.

|                            | intra-day |              | inter-day |              |
|----------------------------|-----------|--------------|-----------|--------------|
| <b>m<sup>5</sup>C (nM)</b> | RSD (%)   | Recovery (%) | RSD (%)   | Recovery (%) |
| 0.125                      | 8.7       | 99.8         | 6.4       | 99.4         |
| 1.25                       | 12        | 89.6         | 7.7       | 92.4         |
| 6.25                       | 3.0       | 102          | 0.3       | 102          |
|                            |           |              |           |              |
| <b>Cm (nM)</b>             | RSD (%)   | Recovery (%) | RSD (%)   | Recovery (%) |
| 0.113                      | 4.8       | 94.4         | 4.6       | 96.1         |
| 1.136                      | 8.0       | 90.4         | 5.7       | 94.2         |
| 5.68                       | 4.6       | 99.7         | 0.9       | 99.0         |
|                            |           |              |           |              |
| <b>m<sup>6</sup>A (nM)</b> | RSD (%)   | Recovery (%) | RSD (%)   | Recovery (%) |
| 0.032                      | 8.3       | 105          | 5.9       | 105          |
| 0.32                       | 6.2       | 97.6         | 3.6       | 95.2         |
| 1.26                       | 3.7       | 98.5         | 0.6       | 99.1         |
|                            |           |              |           |              |
| <b>Am (nM)</b>             | RSD (%)   | Recovery (%) | RSD (%)   | Recovery (%) |
| 0.025                      | 2.9       | 100.2        | 4.8       | 102          |
| 0.25                       | 4.2       | 96.9         | 2.0       | 99.2         |
| 1.03                       | 4.7       | 104          | 7.0       | 96.6         |

**Table S3.** The stabilities of m<sup>5</sup>C, Cm, m<sup>6</sup>A and Am present in total RNA after three cycles of freeze (stored at -20°C for 24 hrs) and thaw (to room temperature). Shown are the percent recoveries and relative standard deviation (n = 3) obtained for the levels of the modified nucleosides measured after three cycles of freeze and thaw (relative to the levels of the modifications measured prior to freeze-and-thaw).

|                  | total RNA |              |
|------------------|-----------|--------------|
|                  | RSD (%)   | Recovery (%) |
| m <sup>5</sup> C | 1.6       | 81.3         |
| Cm               | 4.1       | 96.0         |
| m <sup>6</sup> A | 4.1       | 122          |
| Am               | 11        | 108          |

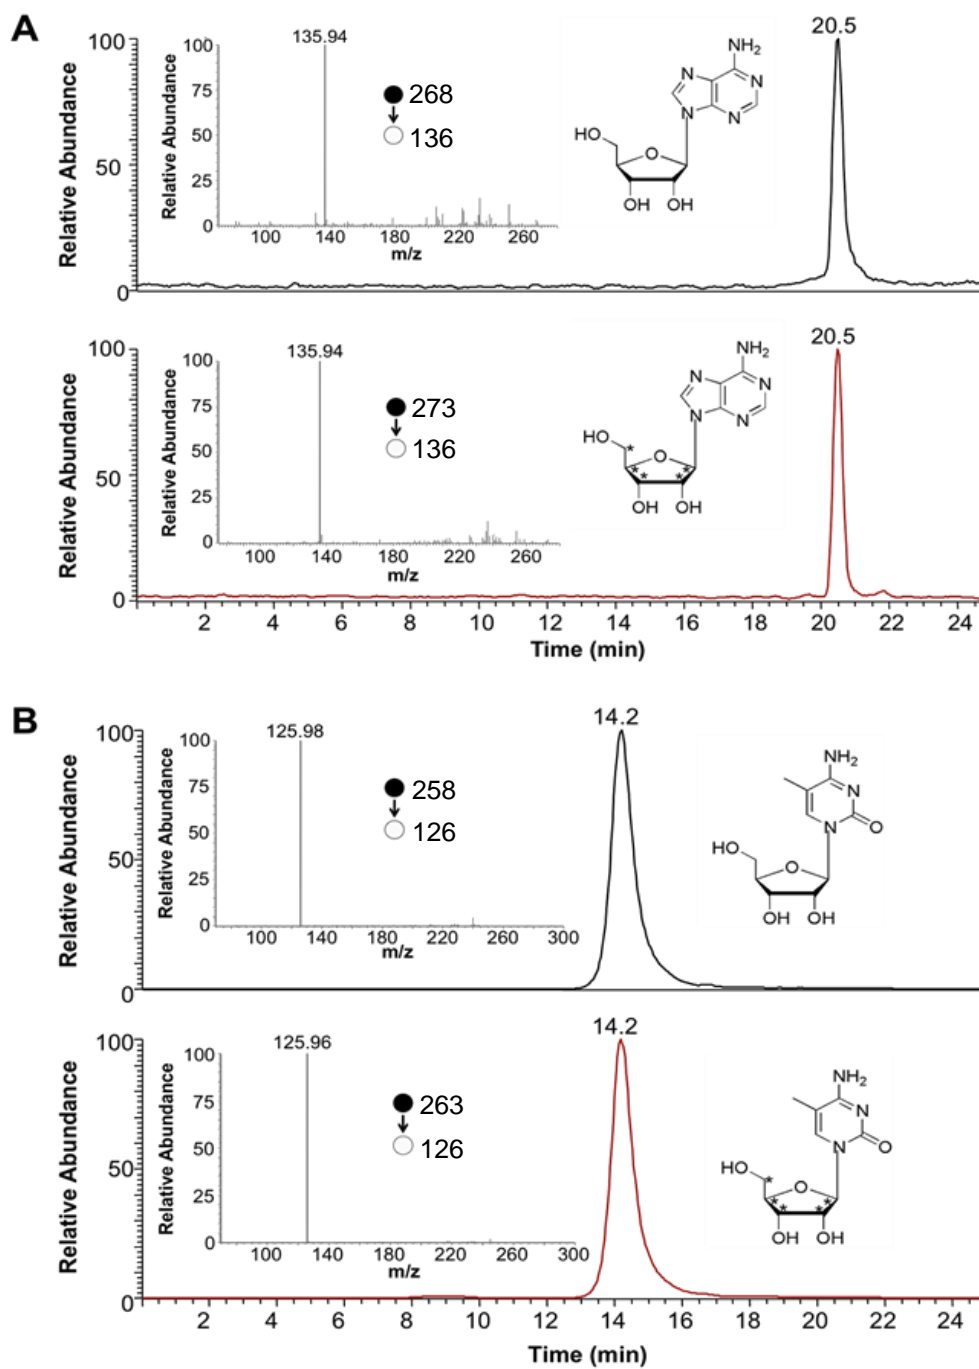

**Figure S1.** LC-MS/MS results for the analyses of unlabeled and purified stable isotope-labeled adenosine (A) and cytidine (B). Shown are the selective-ion chromatograms for monitoring the indicated transitions for the labeled and unlabeled nucleosides. The MS/MS are shown in the insert.

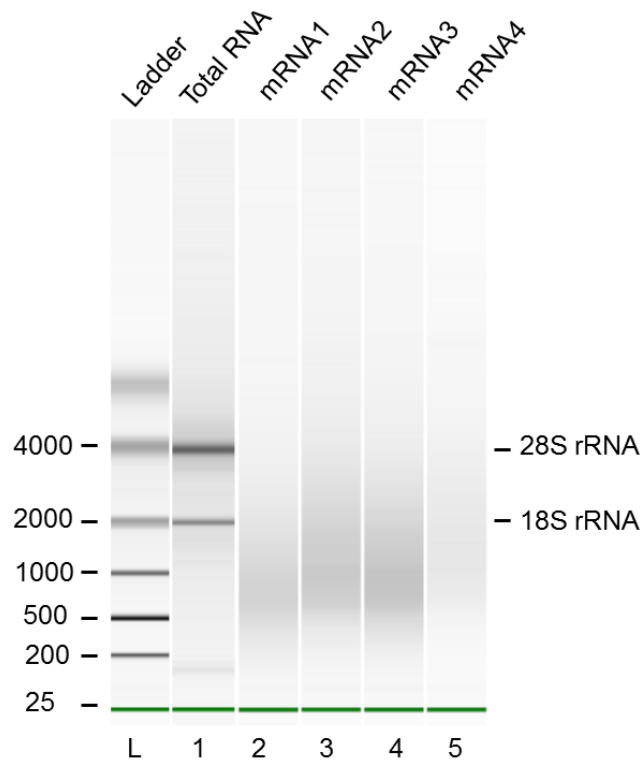

**Figure S2.** The quality of different batches of mRNA isolated from HEK293T cells, as determined by Agilent 2100 Bioanalyzer.

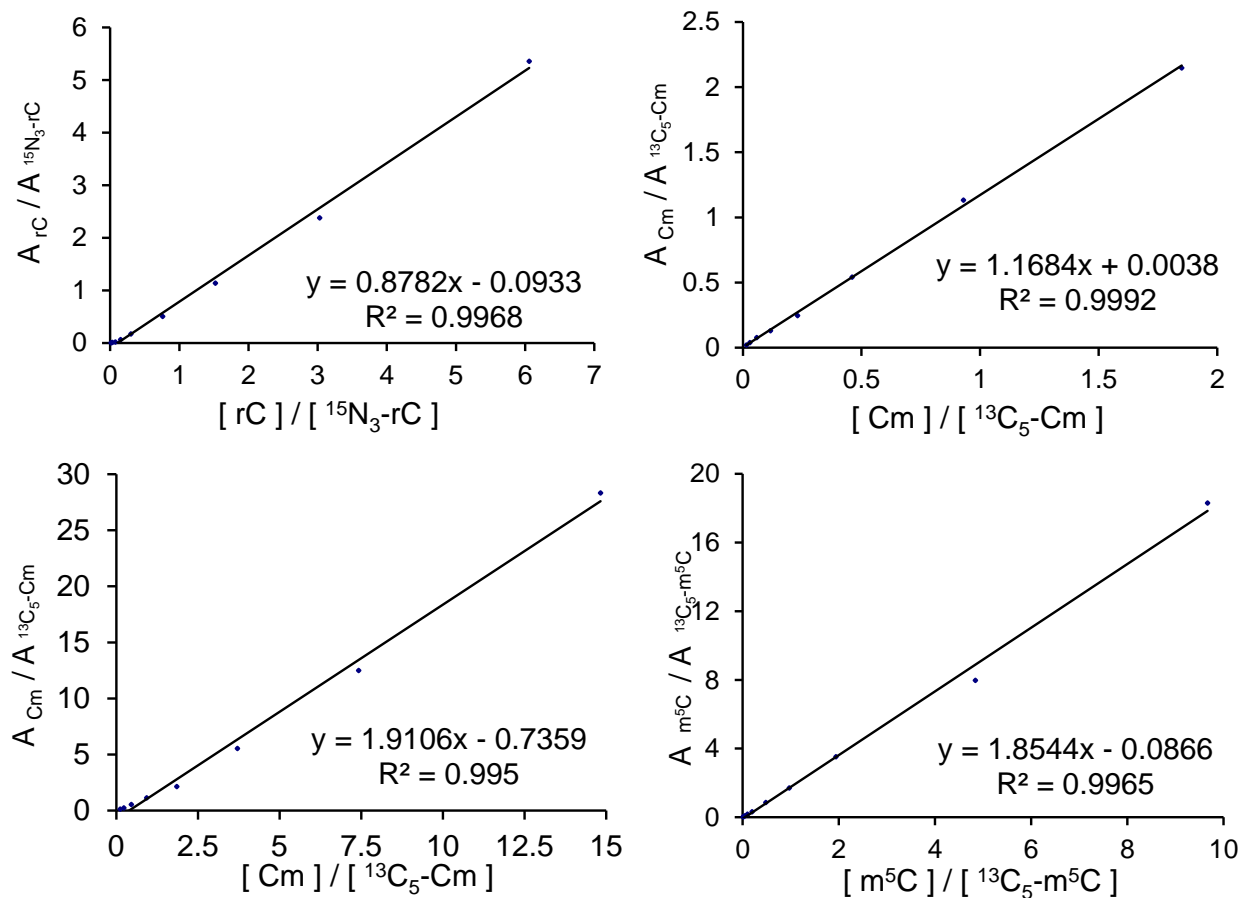

**Figure S3.** Calibration curves for the quantifications of rC, m<sup>5</sup>C and Cm in RNA. The amounts of internal standards were 3300, 25.5 and 19.4 fmol, respectively, and the amounts of unlabeled rC, m<sup>5</sup>C and Cm ranged 49.5 fmol - 20.0 pmol, 0.3 - 144.0 fmol and 0.2 - 246.6 fmol, respectively.

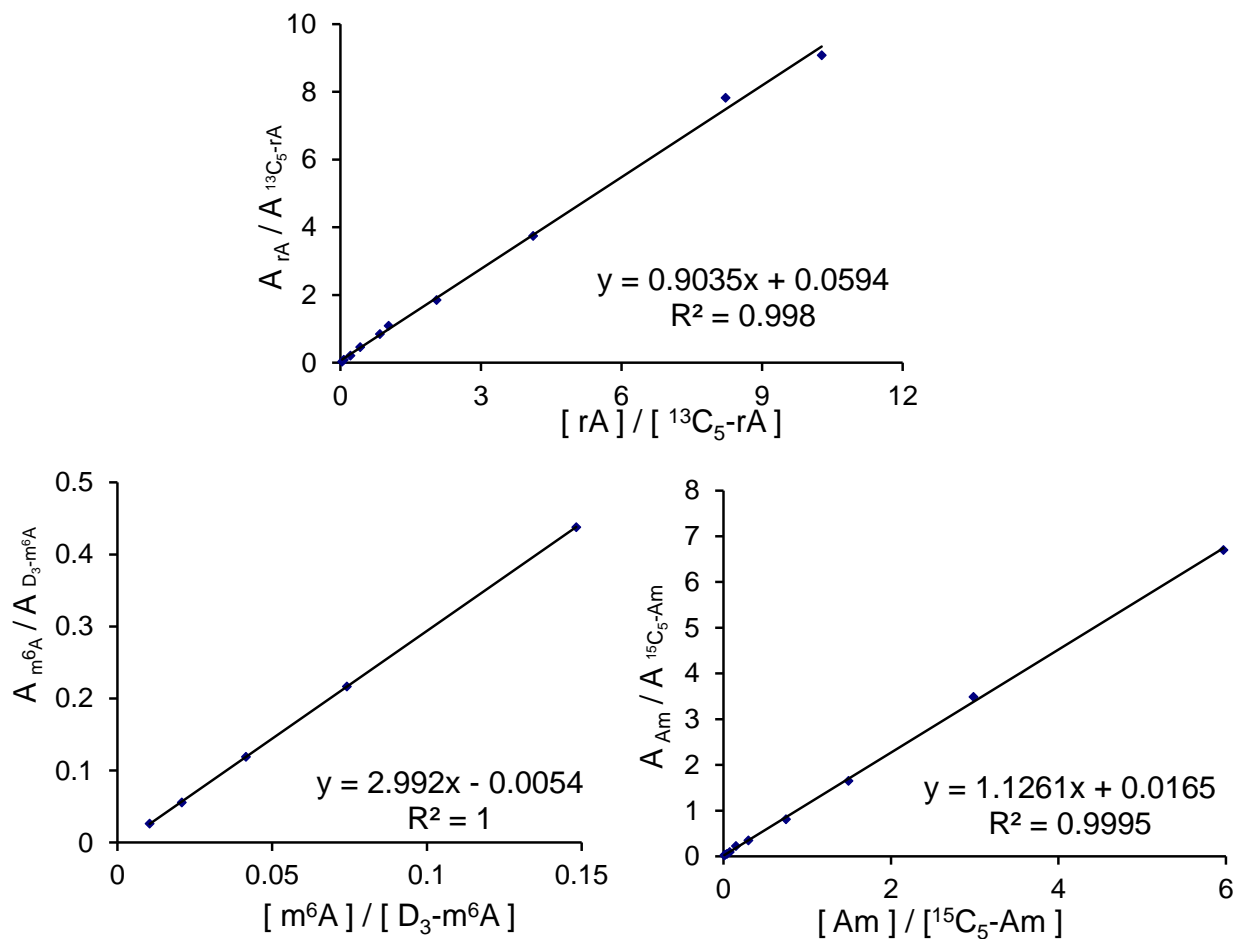

**Figure S4.** The calibration curves for the quantifications of rA,  $m^6\text{A}$  and Am in RNA. The amounts of internal standards were 1555, 8.5 and 6.9 fmol, respectively and the amounts of unlabeled rA,  $m^6\text{A}$  and Am ranged 52.9 fmol - 16.0 pmol, 0.09 - 1.2 fmol and 0.07 - 41.2 fmol, respectively.
